# Supplementary material
Source: publisher site journal article supplement (https://www.spandidos-publications.com/8201/downloadSupplementary)

Figure S1. Sanger sequencing. The results of the Sanger sequencing confirm the presence of mutations TNC c.625G>A and ELMOD3 c.815+1G>C in the affected mother (II-1) but not the proband (III-1). The red arrows indicate the mutation site.

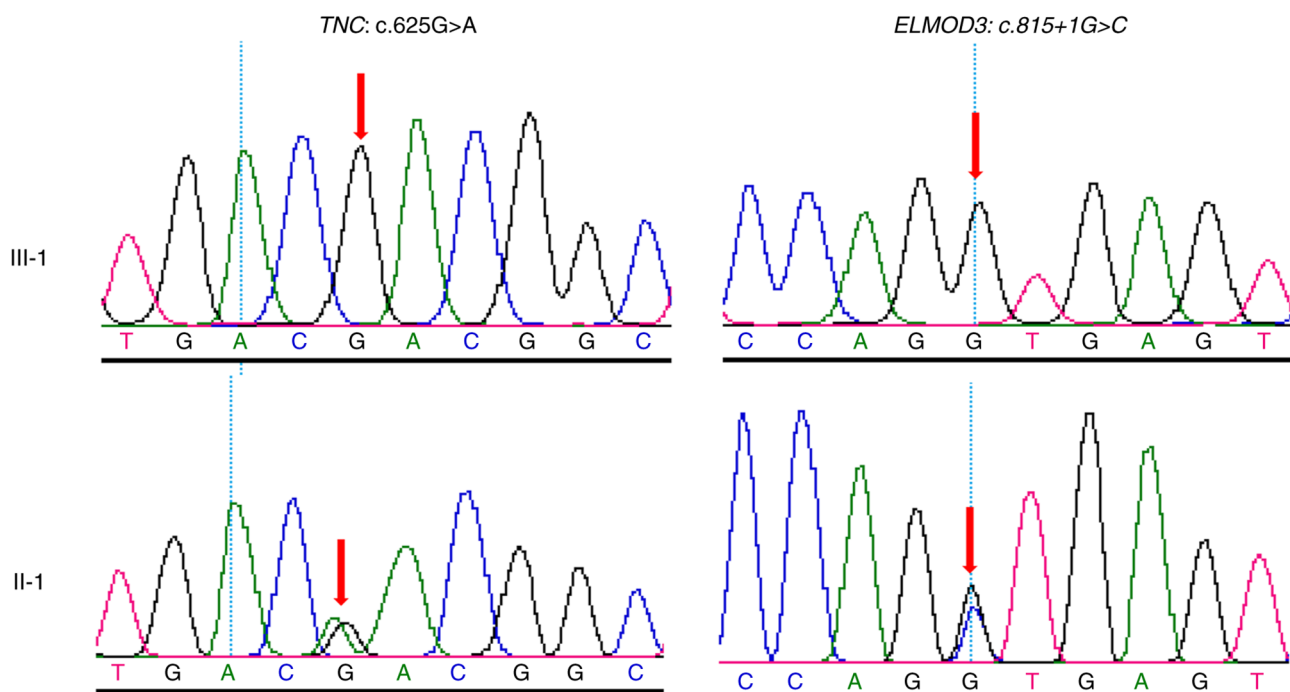

Supplement: Supplementary file 1 [file downloadSupplementary]
